# Supplementary material for: Evolution and neutralization escape of the SARS-CoV-2 BA.2.86 subvariant
Source: Springer Nature journal article supplement (doi:10.1038/s41467-023-43703-3), 2023-12-06
Supplement: MOESM1 [file 41467_2023_43703_MOESM1_ESM.pdf]

## Supplementary Material

### **Evolution and neutralization escape of the SARS-CoV-2 BA.2.86 subvariant**

Khan et al.

#### Contents

|                                                                                                                |    |
|----------------------------------------------------------------------------------------------------------------|----|
| Table S1: Summary Omicron XBB derived variant infected participants.....                                       | 2  |
| Table S2: Omicron XBB derived variant infected participants.....                                               | 2  |
| Table S3: Summary for September 2023 serosurvey.....                                                           | 3  |
| Table S4: Serosurvey participants enrolled in September 2023.....                                              | 3  |
| Table S5: Summary for pre-Omicron Pfizer BNT162b2 vaccinated participants .....                                | 4  |
| Table S6: Pre-Omicron participants vaccinated with Pfizer BNT162b2 .....                                       | 4  |
| Table S7: Summary for Omicron BA.1 infected participants .....                                                 | 5  |
| Table S8: Omicron BA.1 infected participants .....                                                             | 5  |
| Figure S1: Phylogenetic structure of BA.2.86 spread .....                                                      | 6  |
| Figure S2: Timing of the different variant infection waves in South Africa .....                               | 7  |
| Figure S3: Magnified view of infection foci .....                                                              | 8  |
| Figure S4: Relationship of focus forming units to fold-change as determined by qPCR in a dilution series ..... | 9  |
| Figure S5: BA.2.86 replication in H1299-ACE2 cells.....                                                        | 10 |
| Figure S6: Estimation of infectivity .....                                                                     | 11 |

Table S1: Summary Omicron XBB derived variant infected participants

|                                             | n=21       |
|---------------------------------------------|------------|
| Age (median, IQR)                           | 45 (31-63) |
| Female                                      | 13 (62%)   |
| Days post-infection to sample (median, IQR) | 21 (14-29) |
| Fraction vaccinated                         | 13 (62%)   |
| PLWH                                        | 7 (33%)    |

Table S2: Omicron XBB derived variant infected participants

| #  | Sex | Age range | Sample collection date | Infection date | Infect. to sample (days) | Vacc. Status | Vacc. doses | Last vaccine | HIV status | XBB.1.5 FRNT50 | BA.2.86 FRNT50 |
|----|-----|-----------|------------------------|----------------|--------------------------|--------------|-------------|--------------|------------|----------------|----------------|
| 1  | F   | 30-39     | May 23                 | Apr 23         | 14                       | mRNA         | 2           | Jul 21       | -          | 629            | 349            |
| 2  | F   | 50-59     | Jun 23                 | May 23         | 29                       | mRNA         | 3           | Sep 21       | -          | 924            | 629            |
| 3  | F   | 20-29     | Jun 23                 | Jun 23         | 15                       | Ad26         | 2           | May 21       | -          | 549            | 323            |
| 4  | M   | 60-69     | Sep 23                 | Aug 23         | 23                       | Ad26/Moderna | 2           | Oct 22       | -          | 80             | 58             |
| 5  | F   | 20-29     | May 23                 | Apr 23         | 21                       | Ad26         | 2           | Dec 21       | -          | 1127           | 764            |
| 6  | F   | 60-69     | May 23                 | May 23         | 13                       | mRNA         | 3           | Mar 22       | +          | 505            | 404            |
| 7  | F   | 70-79     | May 23                 | May 23         | 7                        | mRNA         | 2           | Nov 21       | -          | 3262           | 2175           |
| 8  | M   | 40-49     | Jun 23                 | May 23         | 24                       | Ad26/mRNA    | 2           | Nov 22       | -          | 948            | 354            |
| 9  | F   | 80-89     | Jun 23                 | May 23         | 29                       | mRNA         | 2           | Jun 21       | -          | 458            | 128            |
| 10 | M   | 70-79     | Oct 22                 | Oct 22         | 14                       | mRNA         | 2           | Aug 21       | -          | 2522           | 1273           |
| 11 | F   | 30-39     | Feb 23                 | Jan 23         | 35                       | mRNA         | 2           | Oct 21       | +          | 11             | 8              |
| 12 | M   | 30-39     | Mar 23                 | Feb 23         | 30                       | mRNA         | 2           | Jun 21       | -          | 234            | 50             |
| 13 | F   | 40-49     | May 23                 | Apr 23         | 15                       | Ad26         | 1           | May 21       | +          | 113            | 110            |
| 14 | M   | 50-59     | May 23                 | Apr 23         | 12                       | Unvacc.      | -           | -            | -          | 10239          | 1736           |
| 15 | F   | 40-49     | Feb 23                 | Jan 23         | 33                       | Unvacc.      | -           | -            | -          | 276            | 134            |
| 16 | F   | 30-39     | Mar 23                 | Mar 23         | 17                       | Unvacc.      | -           | -            | +#         | 2003           | 1770           |
| 17 | M   | 60-69     | Apr 23                 | Apr 23         | 28                       | Unvacc.      | -           | -            | -          | 956            | 39             |
| 18 | M   | 20-29     | Jun 23                 | May 23         | 22                       | Unvacc.      | -           | -            | +#         | 58             | 171            |
| 19 | F   | 30-39     | May 23                 | Mar 23         | 37                       | Unvacc.      | -           | -            | +          | 9              | 27             |
| 20 | F   | 40-49     | Jun 23                 | May 23         | 21                       | Unvacc.      | -           | -            | +          | 25             | 50             |
| 21 | M   | 30-39     | Jun 23                 | Jun 23         | 14                       | Unvacc.      | -           | -            | -          | 502            | 600            |

Infection date is by date of first available positive qPCR test. All participants living with HIV were HIV suppressed (HIV viral load <200 copies/mL) except for #, where HIV viral load = 48685 and & where HIV viral load = 89040. mRNA: Pfizer-BioNTech BNT162b2 mRNA vaccine. Ad26: Janssen Ad26.COV2.S vectored vaccine. All vaccines based on ancestral spike sequence.

Table S3: Summary for September 2023 serosurvey

|                     | n=40       |
|---------------------|------------|
| Age (median, IQR)   | 29 (25-36) |
| Female              | 33 (83%)   |
| Fraction vaccinated | 31 (78%)   |

Vaccination status unavailable for 2 participants, HIV status was not tested.

Table S4: Serosurvey participants enrolled in September 2023

| #  | Sex | Age Range | Vacc. Status | Vacc. doses | Last vaccine | XBB.1.5 FRNT50 | BA.2.86 FRNT50 |
|----|-----|-----------|--------------|-------------|--------------|----------------|----------------|
| 1  | F   | 20-29     | Unvacc.      | –           | –            | 332            | 125            |
| 2  | M   | 30-39     | Unvacc.      | –           | –            | 14             | 9              |
| 3  | F   | 20-29     | Ad26         | 1           | Aug 21       | 26             | 14             |
| 4  | F   | 20-29     | Ad26         | 1           | Mar 21       | 54             | 6              |
| 5  | F   | 20-29     | Ad26         | 1           | Mar 21       | 42             | 163            |
| 6  | F   | 20-29     | Ad26         | 1           | Jun 22       | 246            | 565            |
| 7  | F   | 20-29     | Ad26         | 1           | Jun 22       | 135            | 320            |
| 8  | F   | 20-29     | Ad26         | 1           | Jun 21       | 8              | 10             |
| 9  | F   | 20-29     | Unvacc.      | –           | –            | 184            | 220            |
| 10 | F   | 20-29     | N/A          | N/A         | N/A          | 141            | 268            |
| 11 | F   | 20-29     | mRNA         | 2           | Feb 22       | 24             | 24             |
| 12 | F   | 20-29     | Unvacc.      | –           | –            | 223            | 54             |
| 13 | F   | 60-69     | Ad26         | 1           | Mar 21       | 168            | 151            |
| 14 | F   | 20-29     | Unvacc.      | –           | –            | 68             | 105            |
| 15 | F   | 20-29     | Unvacc.      | –           | –            | 17             | 9              |
| 16 | F   | 20-29     | Ad26         | 1           | Feb 22       | 90             | 62             |
| 17 | M   | 50-59     | Ad26         | 1           | Mar 21       | 44             | 52             |
| 18 | F   | 10-19     | Ad26         | 1           | Mar 22       | 22             | 46             |
| 19 | F   | 10-19     | Ad26         | 2           | Jan 22       | 1              | 4              |
| 20 | M   | 30-39     | Unvacc.      | –           | –            | 154            | 73             |
| 21 | F   | 30-39     | Ad26         | 2           | Mar 23       | 84             | 65             |
| 22 | F   | 20-29     | Ad26         | 1           | N/A          | 97             | 107            |
| 23 | F   | 30-39     | mRNA         | 2           | N/A          | 5              | 3              |
| 24 | F   | 40-49     | Ad26         | 1           | N/A          | 193            | 164            |
| 25 | F   | 40-49     | Ad26         | 2           | N/A          | 206            | 156            |
| 26 | F   | 20-29     | Ad26         | 2           | N/A          | 74             | 90             |
| 27 | F   | 40-49     | mRNA         | 2           | N/A          | 17             | 72             |
| 28 | F   | 30-39     | mRNA         | 3           | N/A          | 38             | 51             |
| 29 | F   | 20-29     | Ad26         | 1           | May 21       | 9              | 7              |
| 30 | F   | 30-39     | mRNA         | 3           | N/A          | 55             | 12             |
| 31 | M   | 20-29     | Ad26         | 1           | Aug 22       | 5              | 9              |
| 32 | M   | 20-29     | Ad26         | 1           | N/A          | 2              | 12             |
| 33 | F   | 30-39     | mRNA         | 2           | Aug 21       | 236            | 271            |
| 34 | F   | 50-59     | Ad26         | 1           | N/A          | 27             | 25             |
| 35 | M   | 40-49     | Ad26         | 1           | N/A          | 5              | 10             |
| 36 | M   | 30-39     | mRNA         | 2           | N/A          | 1              | 9              |
| 37 | F   | 30-39     | mRNA         | 2           | N/A          | 38             | 75             |
| 38 | F   | 50-59     | N/A          | N/A         | N/A          | 122            | 50             |
| 39 | F   | 20-29     | mRNA         | 3           | N/A          | 1              | 30             |
| 40 | F   | 30-39     | mRNA         | 2           | N/A          | 17             | 35             |

mRNA: Pfizer-BioNTech BNT162b2 mRNA vaccine. Ad26: Janssen Ad26.COVS vectored vaccine. All vaccines based on ancestral spike sequence. N/A – not available.

Table S5: Summary for pre-Omicron Pfizer BNT162b2 vaccinated participants

|                                               | n=19       |
|-----------------------------------------------|------------|
| Age (median, IQR)                             | 52 (41-67) |
| Female                                        | 12 (63%)   |
| Days post-vaccination to sample (median, IQR) | 28 (14-33) |
| PLWH                                          | 8 (42%)    |

Table S6: Pre-Omicron participants vaccinated with Pfizer BNT162b2

| #  | Sex | Age range | Sample collected date | Vacc. doses | Last vaccine | Vacc. to sample (days) | HIV status | D614G FRNT50 | BA.1 FRNT50 | BA.2.86 FRNT50 |
|----|-----|-----------|-----------------------|-------------|--------------|------------------------|------------|--------------|-------------|----------------|
| 1  | F   | 40-49     | Sep 21                | 2           | Aug 21       | 32                     | +          | 942          | 11          | 10             |
| 2  | F   | 40-49     | Oct 21                | 2           | Sep 21       | 34                     | +          | 16920        | 984         | 76             |
| 3  | F   | 60-69     | Oct 21                | 2           | Aug 21       | 63                     | -          | 11789        | 621         | 68             |
| 4  | M   | 40-49     | Oct 21                | 2           | Oct 21       | 18                     | +          | 9629         | 750         | 37             |
| 5  | M   | 70-79     | Aug 21                | 2           | Jun 21       | 38                     | -          | 5025         | 138         | 36             |
| 6  | F   | 60-69     | Jul 21                | 2           | Jul 21       | 11                     | -          | 301          | 16          | 10             |
| 7  | M   | 70-79     | Jul 21                | 2           | Jul 21       | 11                     | -          | 720          | 45          | 9              |
| 8  | M   | 30-39     | Aug 21                | 2           | Jul 21       | 15                     | +          | 894          | 44          | 10             |
| 9  | F   | 70-79     | Jul 21                | 2           | Jul 21       | 10                     | -          | 301          | 24          | 17             |
| 10 | F   | 30-39     | Jul 21                | 2           | Jul 21       | 11                     | +          | 2002         | 76          | 16             |
| 11 | F   | 20-29     | Nov 21                | 2           | Oct 21       | 31                     | -          | 3625         | 235         | 13             |
| 12 | M   | 20-29     | Nov 21                | 2           | Oct 21       | 30                     | -          | 2963         | 104         | 28             |
| 13 | F   | 60-69     | Aug 21                | 2           | Jul 21       | 28                     | -          | 59259        | 1143        | 74             |
| 14 | M   | 60-69     | Aug 21                | 2           | Jul 21       | 26                     | -          | 71412        | 2780        | 117            |
| 15 | F   | 40-49     | Nov 21                | 2           | Oct 21       | 33                     | +          | 15276        | 1105        | 328            |
| 16 | M   | 50-59     | Oct 21                | 2           | Sep 21       | 30                     | -          | 21376        | 759         | 73             |
| 17 | F   | 50-59     | Nov 21                | 2           | Oct 21       | 13                     | -          | 2915         | 385         | 91             |
| 18 | F   | 60-69     | Nov 21                | 2           | Nov 21       | 14                     | +          | 12700        | 174         | 118            |
| 19 | F   | 30-39     | Aug 21                | 2           | Jul 21       | 34                     | +          | 259          | 5           | 5              |

All participants living with HIV were HIV suppressed (HIV viral load <200 copies/mL).

Table S7: Summary for Omicron BA.1 infected participants

|                                             | n=19       |
|---------------------------------------------|------------|
| Age (median, IQR)                           | 51 (35-57) |
| Female                                      | 14 (74%)   |
| Days post-infection to sample (median, IQR) | 23 (21-24) |
| Fraction vaccinated                         | 11 (58%)   |
| PLWH                                        | 8 (42%)    |

Table S8: Omicron BA.1 infected participants

| #  | Sex | Age range | Sample collection date | Infection date | Infect. to sample (days) | Vacc. Status | Vacc. doses | Last vaccine | HIV status | BA.1 FRNT50 | XBB.1.5 FRNT50 | BA.2.86 FRNT50 |
|----|-----|-----------|------------------------|----------------|--------------------------|--------------|-------------|--------------|------------|-------------|----------------|----------------|
| 1  | M   | 50-59     | Jan 22                 | Dec 21         | 17                       | mRNA         | 2           | Aug 21       | +          | 1336        | 256            | 186            |
| 2  | M   | 30-39     | Dec 21                 | Dec 21         | 23                       | Ad26         | 1           | Mar 21       | -          | 732         | 43             | 41             |
| 3  | M   | 30-39     | Dec 21                 | Nov 21         | 21                       | Ad26         | 2           | May 21       | -          | 1283        | 17             | 12             |
| 4  | F   | 50-59     | Dec 21                 | Dec 21         | 23                       | mRNA         | 2           | Jul 21       | +          | 756         | 63             | 24             |
| 5  | F   | 30-39     | Jan 22                 | Dec 21         | 22                       | Ad26         | 2           | Apr 21       | +          | 899         | 177            | 169            |
| 6  | F   | 60-69     | Jan 22                 | Dec 21         | 24                       | mRNA         | 2           | Jul 21       | -          | 1222        | 84             | 53             |
| 7  | F   | 50-59     | Jan 22                 | Dec 21         | 23                       | Ad26         | 1           | Jul 21       | +          | 522         | 83             | 49             |
| 8  | M   | 30-39     | Dec 21                 | Dec 21         | 27                       | mRNA         | 2           | Jul 21       | -          | 486         | 17             | 15             |
| 9  | F   | 30-39     | Jan 22                 | Dec 21         | 21                       | Ad26         | 1           | Aug 21       | -          | 619         | 35             | 12             |
| 10 | F   | 80-89     | Jan 22                 | Jan 22         | 22                       | mRNA         | 2           | Jul 21       | -          | 1211        | 469            | 170            |
| 11 | M   | 60-69     | Jan 22                 | Dec 21         | 24                       | mRNA         | 2           | Jul 21       | -          | 265         | 84             | 70             |
| 12 | F   | 30-39     | Jan 22                 | Dec 21         | 23                       | Unvacc.      | N/A         |              | +          | 7963        | 187            | 207            |
| 13 | F   | 20-29     | Dec 21                 | Dec 21         | 21                       | Unvacc.      | N/A         |              | -          | 540         | 36             | 69             |
| 14 | F   | 20-29     | Dec 21                 | Dec 21         | 21                       | Unvacc.      | N/A         |              | -          | 345         | 46             | 55             |
| 15 | F   | 50-59     | Jan 22                 | Dec 21         | 31                       | Unvacc.      | N/A         |              | +          | 290         | 77             | 64             |
| 16 | F   | 60-69     | Jan 22                 | Dec 21         | 17                       | Unvacc.      | N/A         |              | -          | 826         | 34             | 66             |
| 17 | F   | 50-59     | Jan 22                 | Dec 21         | 27                       | Unvacc.      | N/A         |              | +          | 317         | 26             | 40             |
| 18 | F   | 50-59     | Jan 22                 | Dec 21         | 21                       | Unvacc.      | N/A         |              | -          | 1047        | 50             | 30             |
| 19 | F   | 50-59     | Jan 22                 | Dec 21         | 31                       | Unvacc.      | N/A         |              | +          | 2001        | 158            | 134            |

Infection date is by date of first available positive qPCR test. All participants living with HIV were HIV suppressed (HIV viral load <200 copies/mL). mRNA: Pfizer-BioNTech BNT162b2 mRNA vaccine. Ad26: Janssen Ad26.COVS.S vectored vaccine. All vaccines based on ancestral spike sequence.

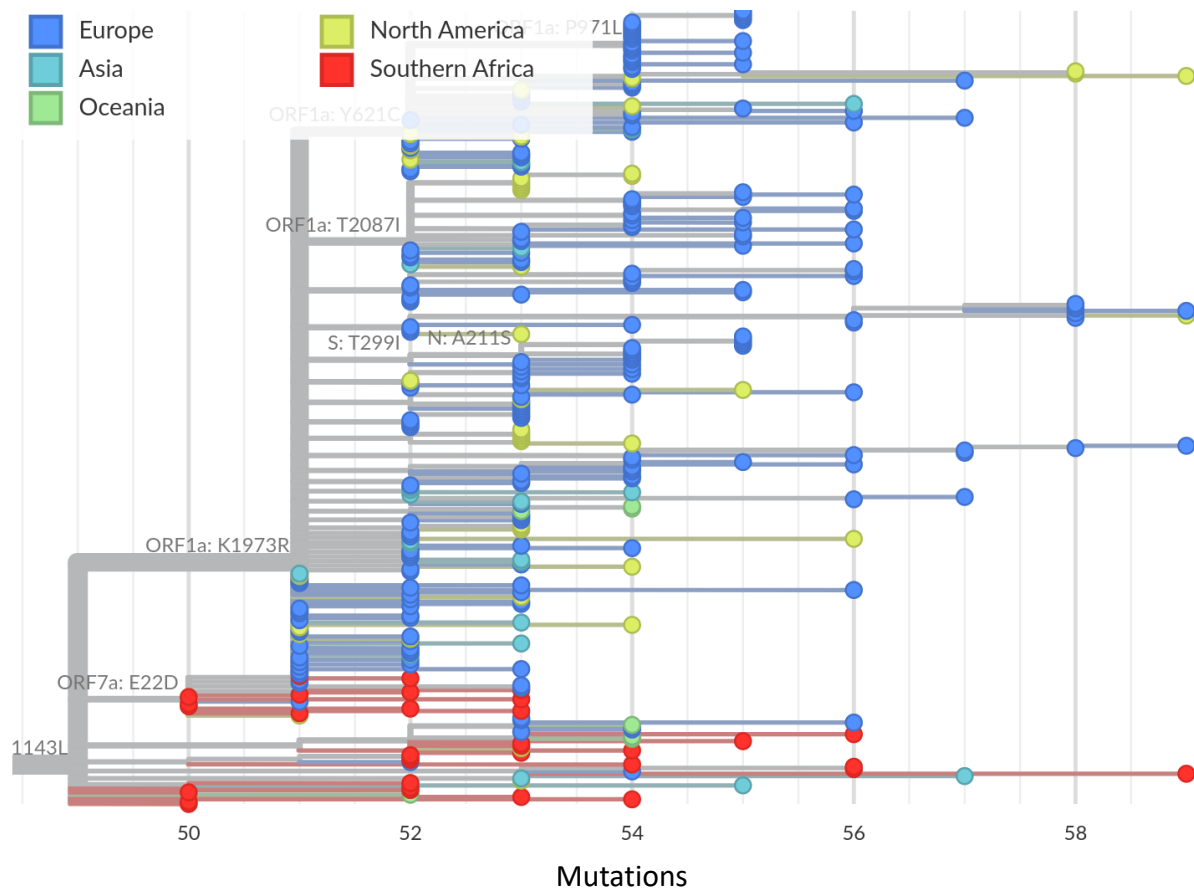

**Figure S1: Phylogenetic structure of BA.2.86 spread.** BA.2.86 differs by 49 single nucleotide mutations from BA.2. Within BA.2.86, most samples from the Northern Hemisphere fall into the large polytomy at the top. The majority of sequences differ by 3-7 mutations from the inferred MRCA of BA.2.86 with some sequences differing only by one mutation, others by up to 10 mutations.

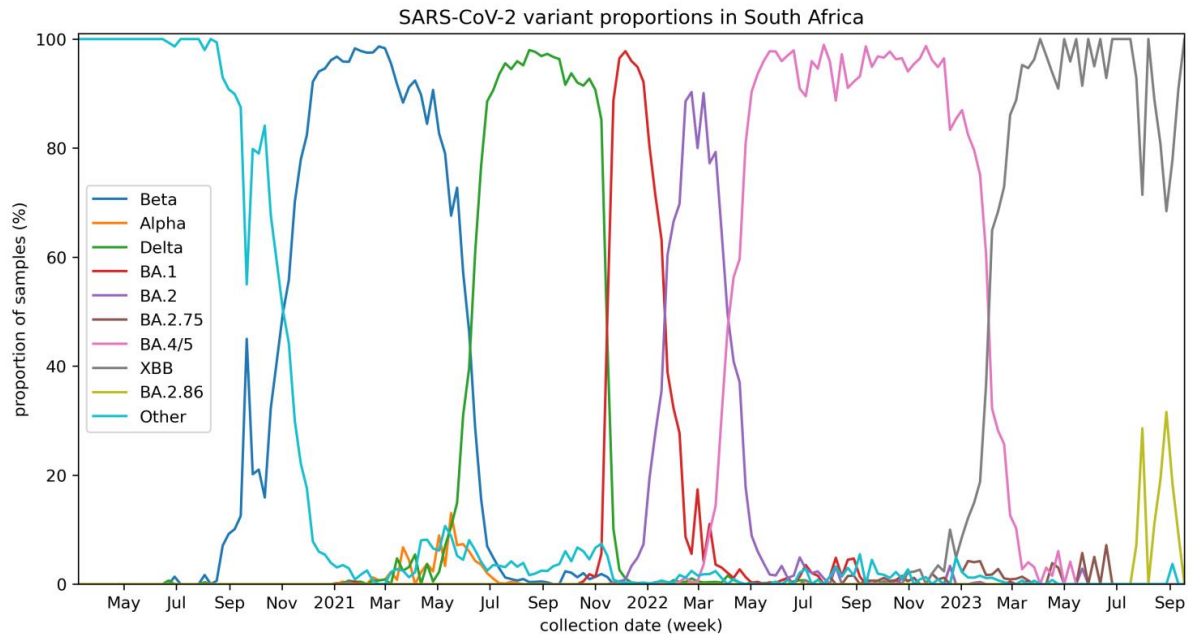

**Figure S2: Timing of the different variant infection waves in South Africa.** Plot of relative variant frequencies in South African consensus sequences binned by calendar week. Sequences deposited in GISAID were assigned to broad variant categories using a combination of Nextstrain clades and Pango lineages as called by Nextclade. The code used to produce the figure is available at <https://github.com/neherlab/BA286/tree/master/variant-prevalence>.

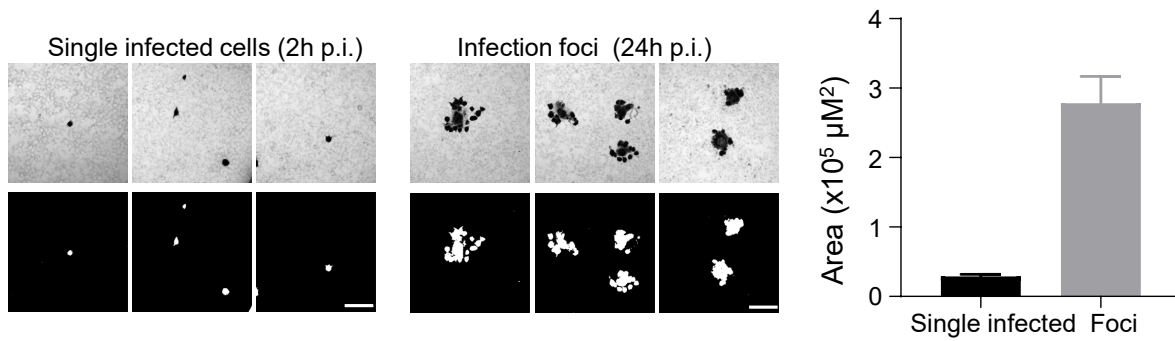

**Figure S3: Magnified view of infection foci.** Shown are three representative fields of view for infected H1299-ACE2 cells 2 hours post-addition of single infected cells to an uninfected cell layer (left set of images) and infection foci at 24 hours post-infection (right set of images). Bottom images are the masked images showing the antibody labelled infected cell or focus as white. Scale bar is 200  $\mu\text{m}$ . Bar plot shows single infected cell and focus area (mean and standard deviation). Results are from 10 fields of view for single infected cells and 5 fields of view for foci.



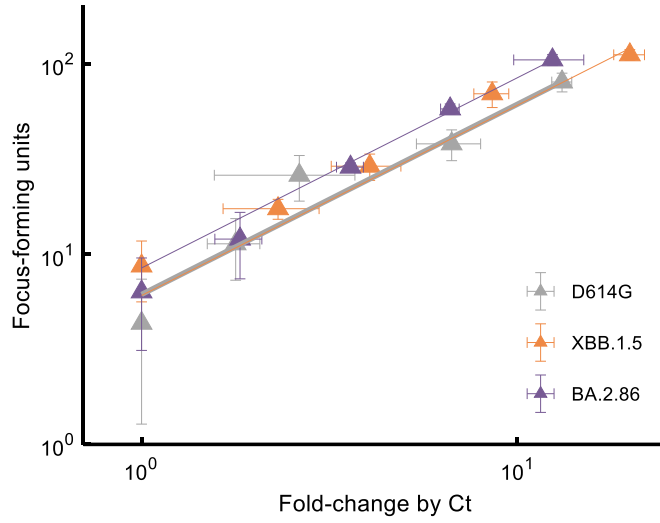

**Figure S4: Relationship of focus forming units to fold-change as determined by qPCR in a dilution series.** Ancestral SARS-CoV-2, XBB.1.5 and BA.2.86 were 2-fold serially diluted starting from a viral concentration which results in approximately 100 foci per well of 96-well plate and used to infect H1299-ACE2 cells. The serial dilution was assayed both for Ct and for focus forming units. Shown are mean and standard deviation from 3 independent experiments, with fold-change calculated as  $2^{(Ct_{MostDiluteSample} - Ct_{Sample})}$ . Solid lines correspond to linear regression fits to the data. Goodness-of-fit values for the linear model and p-values were  $R^2 = 0.972$ ,  $p = 6 \times 10^{-5}$  for ancestral SARS-CoV-2,  $R^2 = 0.953$ ,  $p = 2 \times 10^{-4}$  for XBB.1.5, and  $R^2 = 0.996$ ,  $p = 9 \times 10^{-7}$  for BA.2.86.

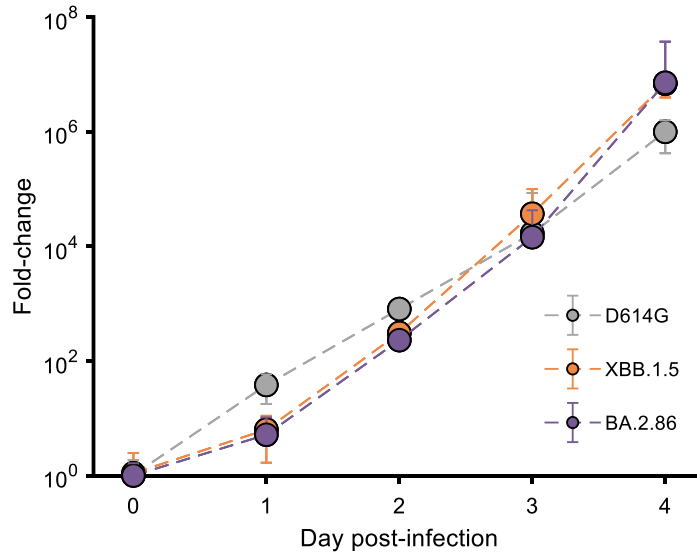

**Figure S5: BA.2.86 replication in H1299-ACE2 cells.** Fold-change in SARS-CoV-2 viral copies was determined using qPCR cycle threshold over 4 days of infection in H1299-ACE2 cells infected by 2 focus forming units per 10<sup>6</sup> cells (5 focus forming units total) using either ancestral SARS-CoV-2, XBB.1.5, or BA.2.86. Shown are median and interquartile ranges for 6 measurements from 3 independent experiments, with fold-change calculated as  $2^{\overline{CtInput} - CtSample}$ , with input being the most dilute sample.

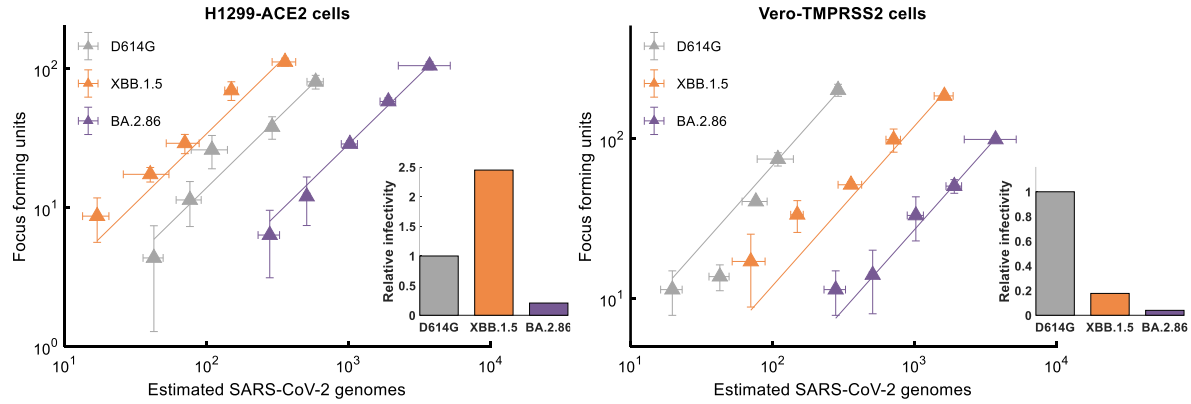

**Figure S6: Estimation of infectivity.** Ancestral SARS-CoV-2, XBB.1.5 and BA.2.86 were 2-fold serially diluted starting from a viral concentration which results in approximately 100 foci per well of 96-well plate and used to infect H1299-ACE2 cells (left) and Vero-TMPRSS2 cells (right). The serial dilution was assayed both for Ct and for focus forming units. Genome copies per  $\mu\text{L}$  were estimated from qPCR Ct values. Unweighted linear regression with y-intercept=0 was performed and is shown as solid lines. Goodness-of-fit values for the linear model and p-values were  $R^2 = 0.972$ ,  $p = 6 \times 10^{-5}$  for ancestral SARS-CoV-2,  $R^2 = 0.953$ ,  $p = 2 \times 10^{-4}$  for XBB.1.5, and  $R^2 = 0.996$ ,  $p = 9 \times 10^{-7}$  for BA.2.86 in H1299-ACE2 cells, and  $R^2 = 0.982$ ,  $p = 2 \times 10^{-5}$  for ancestral SARS-CoV-2,  $R^2 = 0.973$ ,  $p = 7 \times 10^{-5}$  for XBB.1.5, and  $R^2 = 0.992$ ,  $p = 5 \times 10^{-6}$  for BA.2.86 in Vero-TMPRSS2 cells. Slopes correspond to the number of foci produced per genome copy per  $\mu\text{L}$  for each viral strain. Relative infectivity was calculated by normalizing slope for each viral strain to that of ancestral SARS-CoV-2 and is shown as insets.
